# Supplementary material for: The rebound of the body during uphill and downhill running at different speeds
Source: Oxford University Press journal article supplement (doi:10.1242/jeb.142976), 2016-01-01
Supplement: jeb142976supp.pdf [file jeb142976supp.pdf]

| Table S1. Percentage of variance due to the high frequency component of the <i>GRF</i> |                            |        |        |        |        |        |        |        |        |        |
|----------------------------------------------------------------------------------------|----------------------------|--------|--------|--------|--------|--------|--------|--------|--------|--------|
| Slope (°)                                                                              | Speed (m s <sup>-1</sup> ) |        |        |        |        |        |        |        |        |        |
|                                                                                        | 2.22                       | 2.78   | 3.06   | 3.33   | 3.61   | 3.89   | 4.17   | 4.44   | 5      | 5.56   |
| 9                                                                                      | 23±3.4                     | 24±3.3 | 24±3.7 | 24±4.1 | 26±4.3 | 28±4.9 | 28±4.9 | 30±4.9 | 35±5.7 | 40±6.5 |
| 6                                                                                      | 23±3.5                     | 21±3.1 | 22±3.5 | 23±4.1 | 25±4.2 | 26±5.1 | 27±5.1 | 29±5.4 | 32±5   | 35±5.7 |
| 3                                                                                      | 22±3.2                     | 23±3.9 | 24±4.2 | 24±3.5 | 26±4.8 | 28±4.1 | 30±4.3 | 32±3.9 | 35±4.6 | 38±5.5 |
| 0                                                                                      | 25±2.7                     | 28±3.7 | 30±4.8 | 32±4   | 33±5   | 35±3.4 | 37±3.6 | 39±3.3 | 42±4.2 | 43±4.8 |
| -3                                                                                     | 28±3.4                     | 31±3.8 | 33±3.2 | 33±3.2 | 35±3.4 | 37±3.7 | 38±3.6 | 40±3.3 | 43±3.6 |        |
| -6                                                                                     | 33±5.3                     | 35±4.7 | 38±3   | 40±3.4 | 40±3.1 | 42±3   | 44±2.8 | 45±2.9 | 48±3.2 |        |
| -9                                                                                     | 38±6.3                     | 40±5.7 | 42±5.7 | 45±4.5 | 46±3.8 | 47±4.5 | 48±3.8 | 49±3.9 | 51±3.2 |        |

The Fz-time curve was decomposed into its Fourier series components. The four first harmonic were sufficient to reproduce the original measured data. The table presents the variance accounted for by the high frequency components harmonics (n = 2,3,4).

Each class are the 'grand mean' (see methods) ± Standard Deviation. In each class, n=10 except for (+6°; 5.6 m s<sup>-1</sup>) and (+9°; 5.0 m s<sup>-1</sup>) where n= 9 and for (+9°; 5.6 m s<sup>-1</sup>) where n= 7.
